# Supplementary material for: 3D hierarchical Co3O4@Co3S4 nanoarrays as anode and cathode materials for oxygen evolution reaction and hydrogen evolution reaction
Source: Royal Society of Chemistry journal article supplement (doi:10.1039/c8dt04073g), 2018-01-01
Supplement: c8dt04073g1.pdf [file c8dt04073g1.pdf]

### 3D hierarchical $\text{Co}_3\text{O}_4@\text{Co}_3\text{S}_4$ nanoarrays as anode and cathode materials for oxygen evolution reaction and hydrogen evolution reaction

Xiaoqiang Du,<sup>a\*</sup> Hui Su,<sup>b</sup> and Xiaoshuang Zhang<sup>c\*</sup>

#### Preparation of $\text{RuO}_2$

The  $\text{RuO}_2$  catalyst was prepared as follows. In brief, 0.01 mol of  $\text{RuCl}_3 \cdot 3\text{H}_2\text{O}$  was dissolved in 100 mL deionized water and heated under air atmosphere at  $100^\circ\text{C}$  for 10 min, followed by the addition of 1 mL KOH solution (1.0 M). The reaction mixture was maintained at this temperature under stirring for 45 min. After that, the solution was centrifuged for 10 minutes and filtered. The precipitate was washed several times with deionized water to remove the remaining chlorides. The resulting Ruhydroxide was dried for 5 h at  $80^\circ\text{C}$  and then calcined in air at  $300^\circ\text{C}$  for 3 h to obtain  $\text{RuO}_2$ .

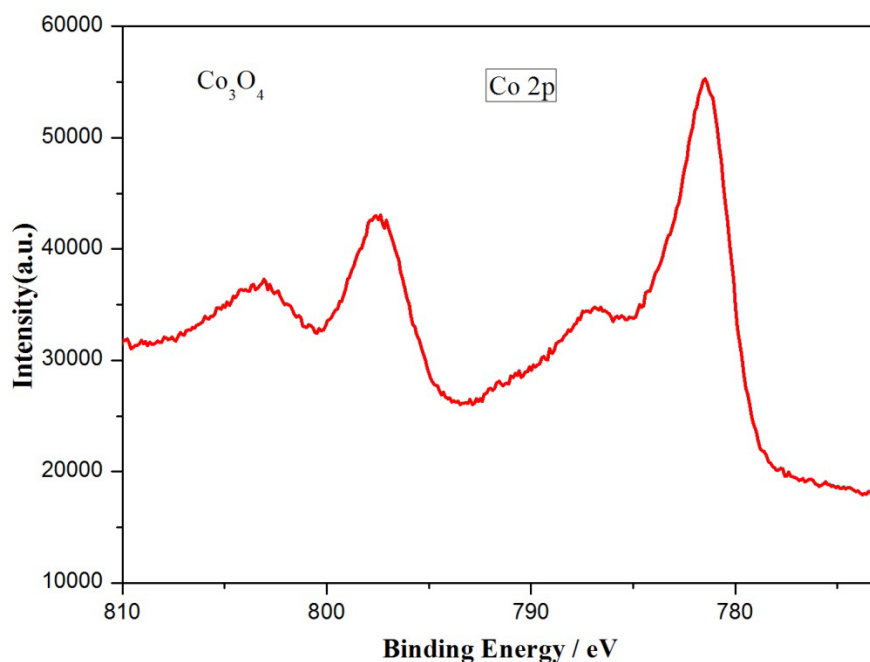

**Fig. S1**XPS spectra of the Co 2p for  $\text{Co}_3\text{O}_4$  /NF.

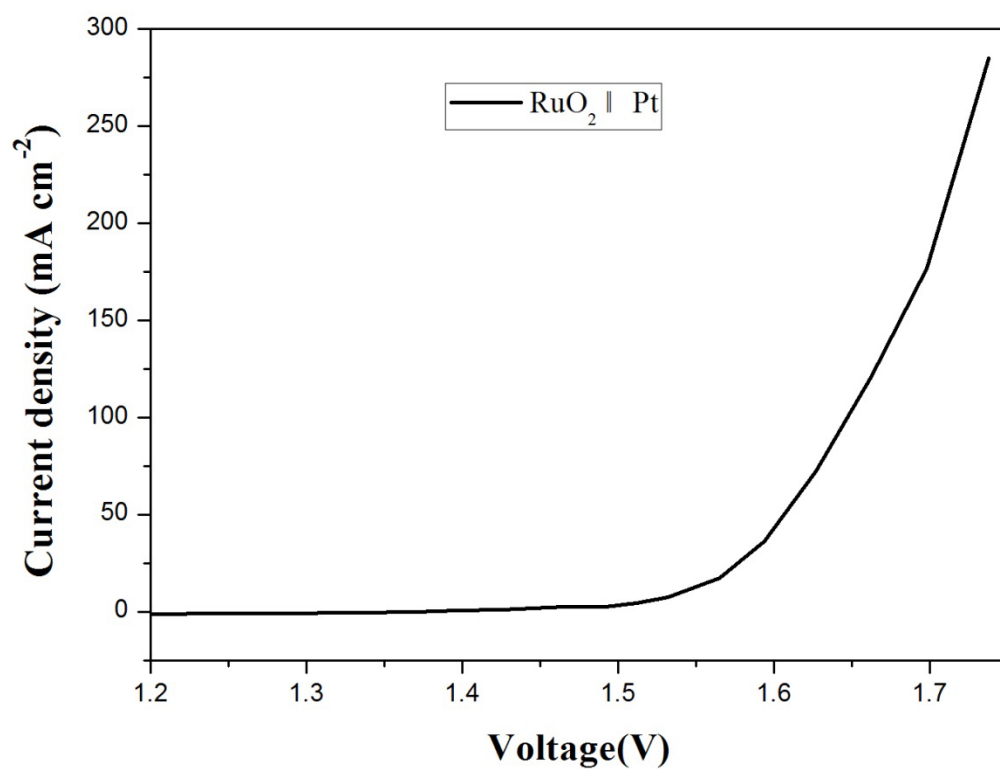

**Fig. S2** Polarization curve of the RuO<sub>2</sub> and Pt for water splitting with a scan rate of 5 mV s<sup>-1</sup> in 1 M KOH.

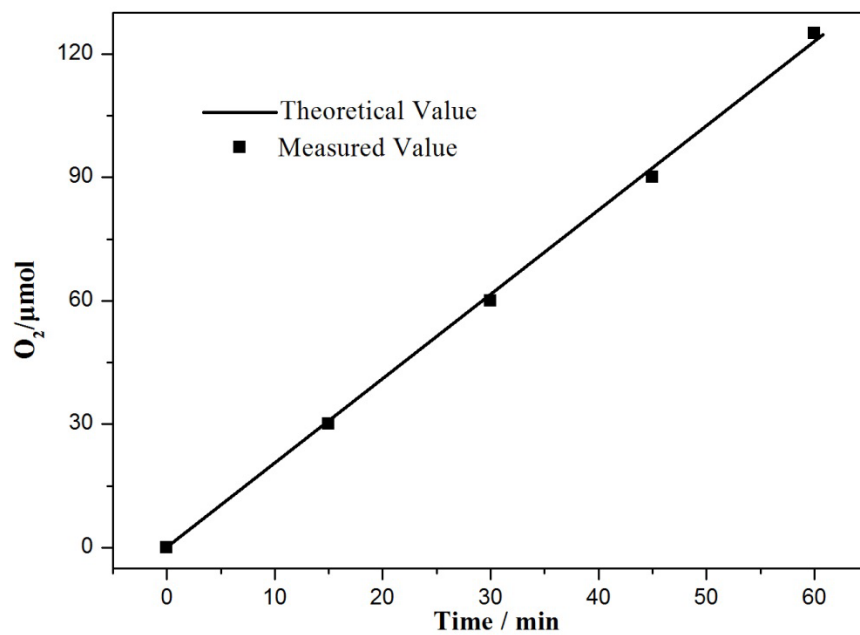

**Fig. S3** Electrocatalytic efficiency of O<sub>2</sub> production over Co<sub>3</sub>O<sub>4</sub>@Co<sub>3</sub>S<sub>4</sub>/NF-24h at a potential of ca. 1.4V, measured for 60 min.

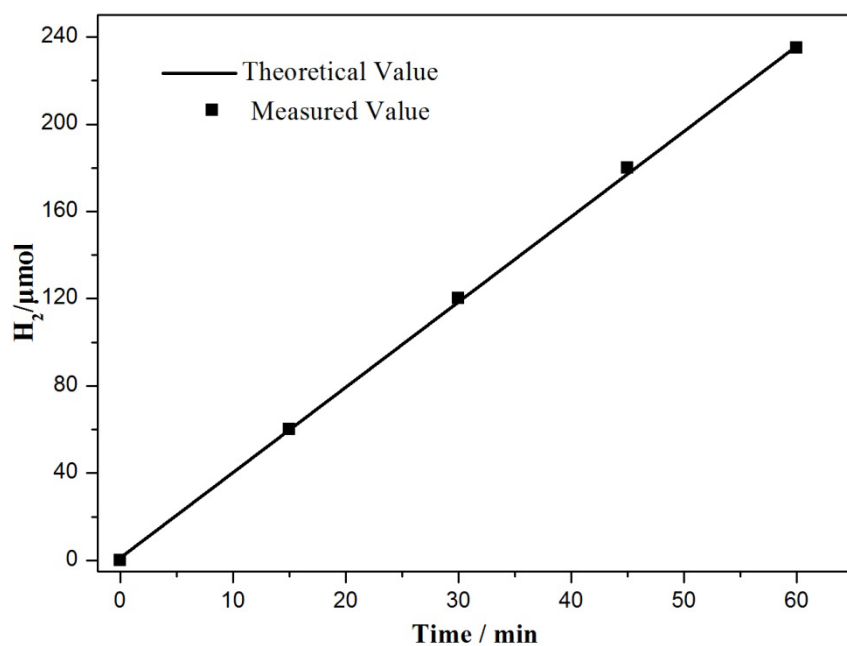

**Fig. S4** Electrocatalytic efficiency of H<sub>2</sub> production over Co<sub>3</sub>O<sub>4</sub>@Co<sub>3</sub>S<sub>4</sub>/NF-24h at a potential of ca. -0.2V, measured for 60 min.

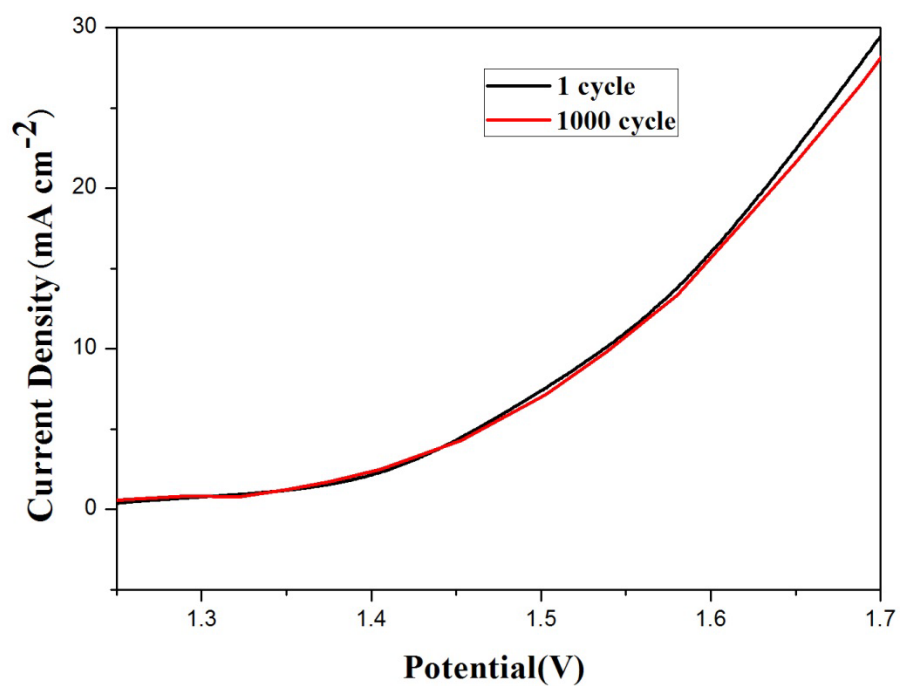

**Fig. S5** The water splitting polarization curves for the Co<sub>3</sub>O<sub>4</sub>@Co<sub>3</sub>S<sub>4</sub>/NF-24h before and after 1000 cycles of the accelerated stability test.

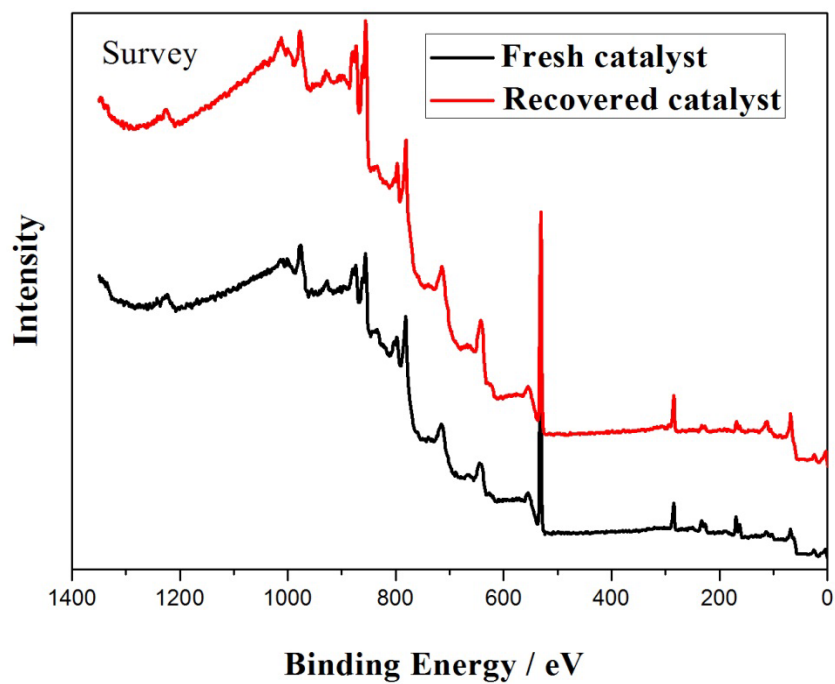

**Fig. S6** Survey of XPS of fresh and recovered  $\text{Co}_3\text{O}_4@\text{Co}_3\text{S}_4/\text{NF}$ -24h.

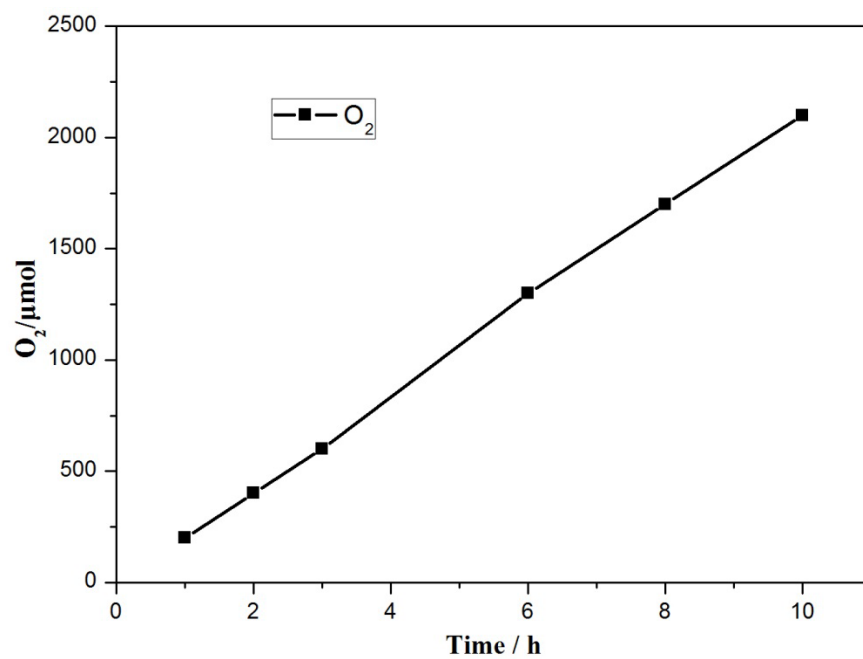

**Fig. S7**  $\text{O}_2$  production over  $\text{Co}_3\text{O}_4@\text{Co}_3\text{S}_4/\text{NF}$ -24h, measured for 10h.

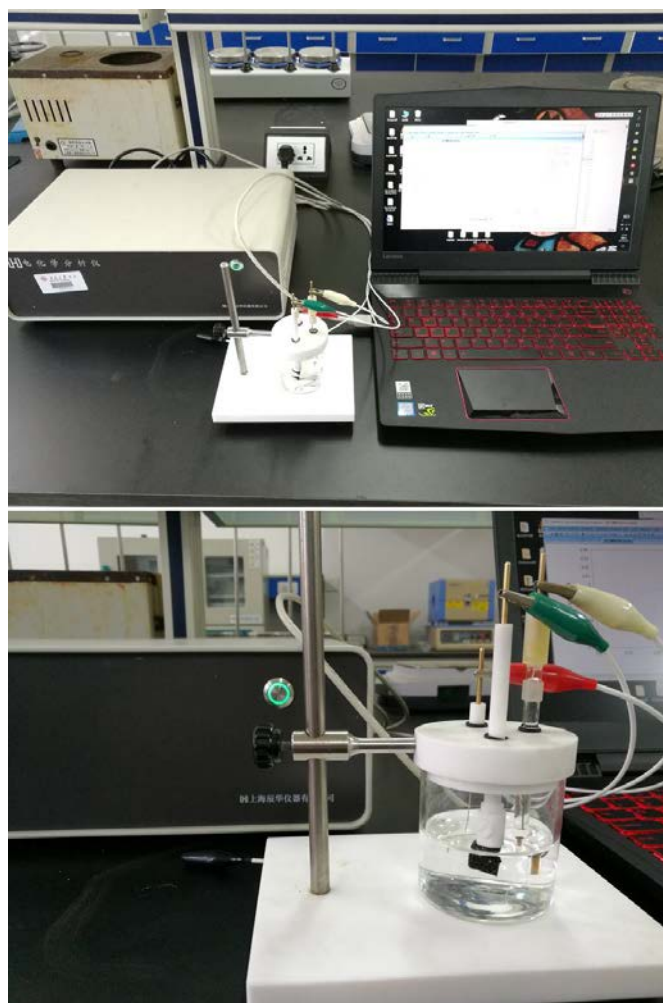

**Fig. S8** A photograph showing generation of O<sub>2</sub> bubbles on the Co<sub>3</sub>O<sub>4</sub>@Co<sub>3</sub>S<sub>4</sub>/NF-24h electrodes.

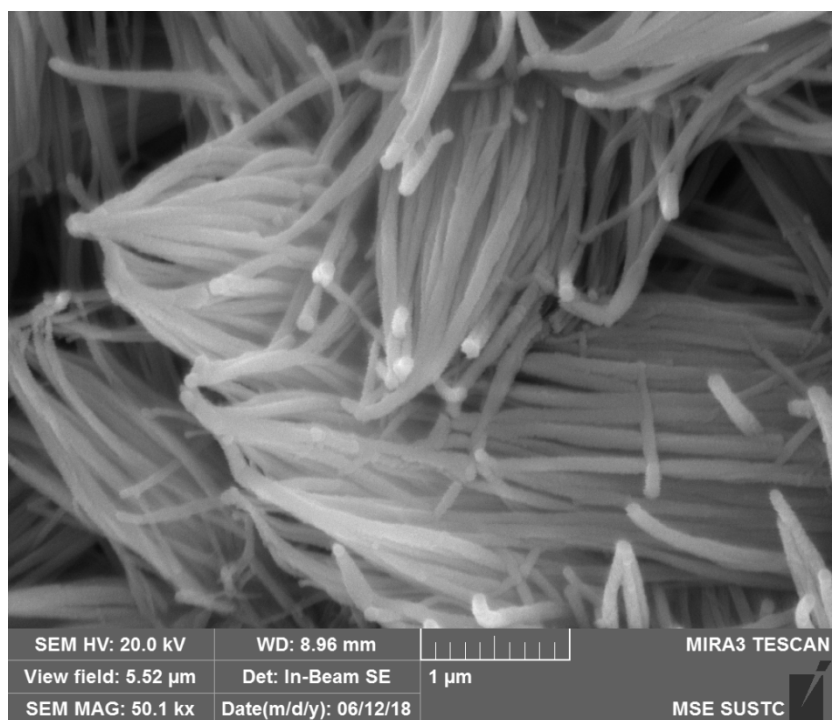

**Fig. S9** SEM of Co<sub>3</sub>O<sub>4</sub>/NF.

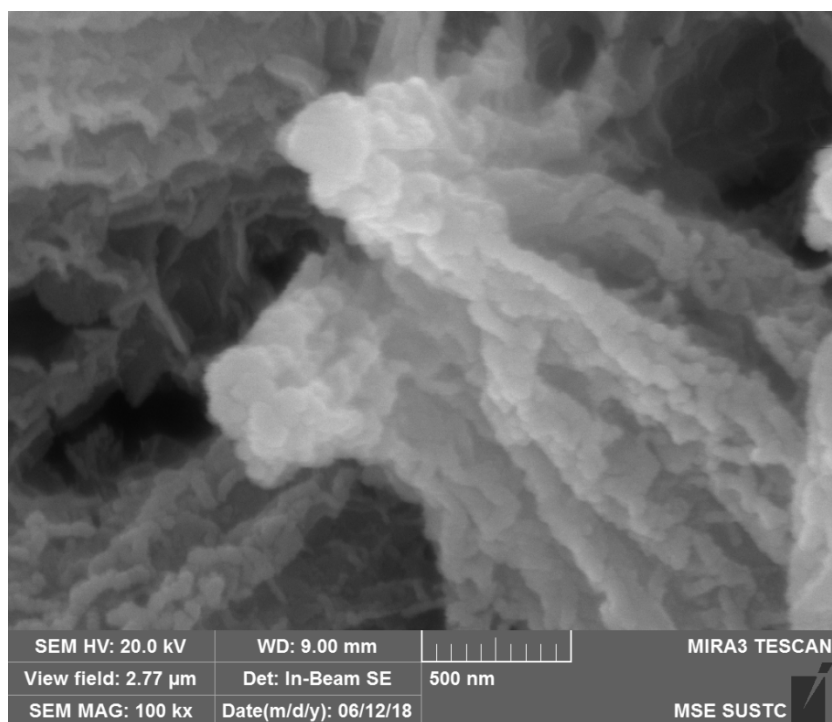

**Fig. S10** SEM of  $\text{Co}_3\text{O}_4@\text{Co}_3\text{S}_4/\text{NF}$ -12h.

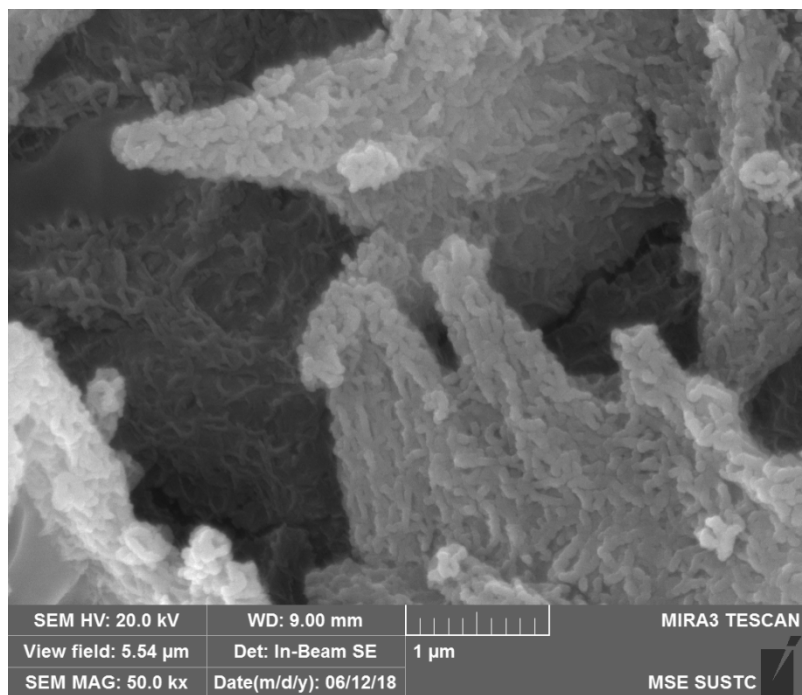

**Fig. S11** SEM of  $\text{Co}_3\text{O}_4@\text{Co}_3\text{S}_4/\text{NF}$ -24h.

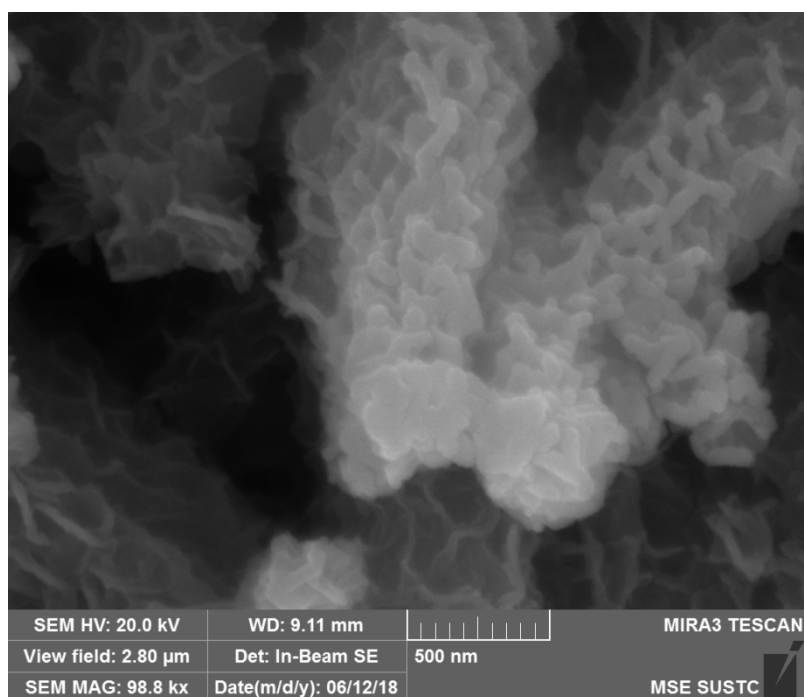

**Fig. S12** SEM of  $\text{Co}_3\text{O}_4@\text{Co}_3\text{S}_4/\text{NF}$ -36h.

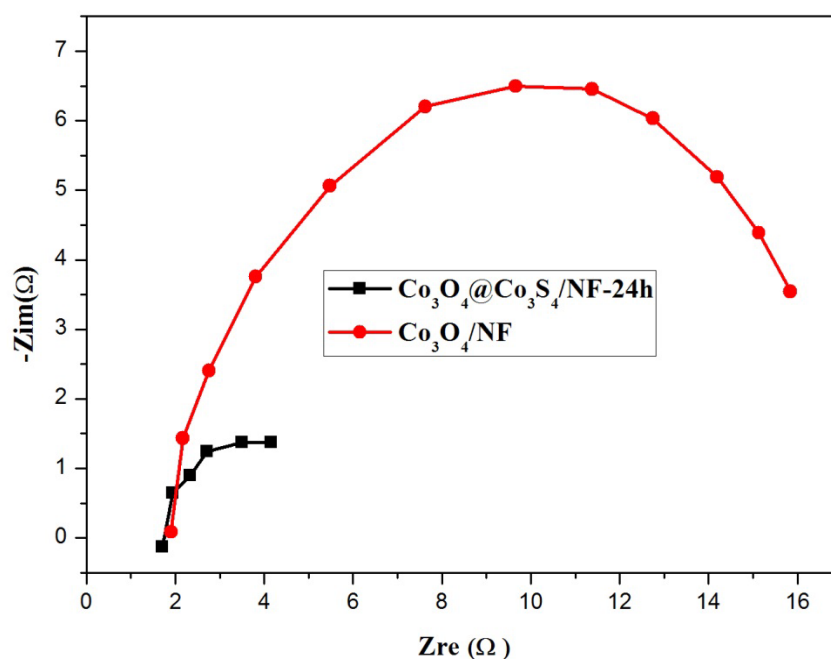

**Fig. S13** Electrochemical impedance spectroscopy of  $\text{Co}_3\text{O}_4/\text{NF}$  and  $\text{Co}_3\text{O}_4@\text{Co}_3\text{S}_4/\text{NF}$ -24h.
